# Supplementary material for: One-pot, template-free syntheses of spherical ZnS nanocrystals using a new S2−source and their photocatalytic study
Source: Royal Society of Chemistry journal article supplement (doi:10.1039/c4ce02556c), 2015-01-01

## Electronic Supplementary Information

### One-pot, template-free syntheses of spherical ZnS nanocrystals using a new S<sup>2-</sup> source and their photocatalytic study

**Manjodh Kaur, Nipun Kumar Gupta and C. M. Nagaraja\***

Department of Chemistry, Indian Institute of Technology Ropar, Rupnagar 140001, Punjab,  
India. Email: [cmnraja@iitrpr.ac.in](mailto:cmnraja@iitrpr.ac.in), Tel:+91-1881242229

Fig. S1 FT-IR spectrum of uncapped ZnS sample S3.

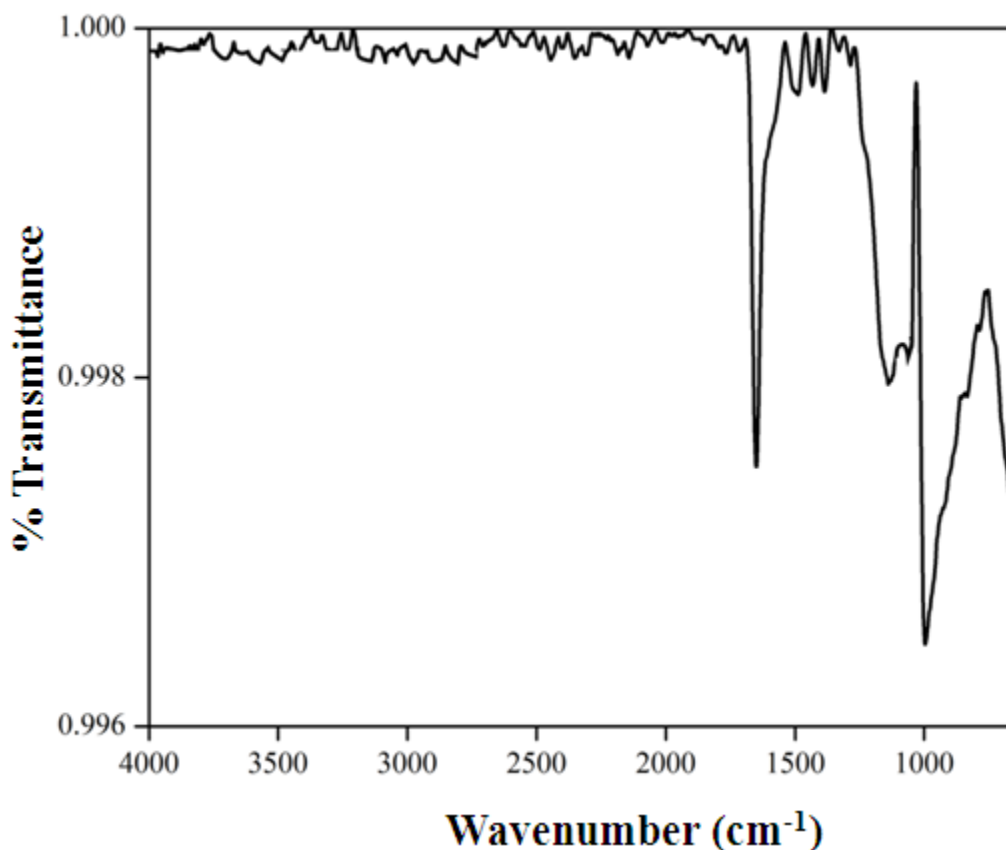

Fig. S2 FT-IR spectrum of MCE-capped ZnS sample S4.

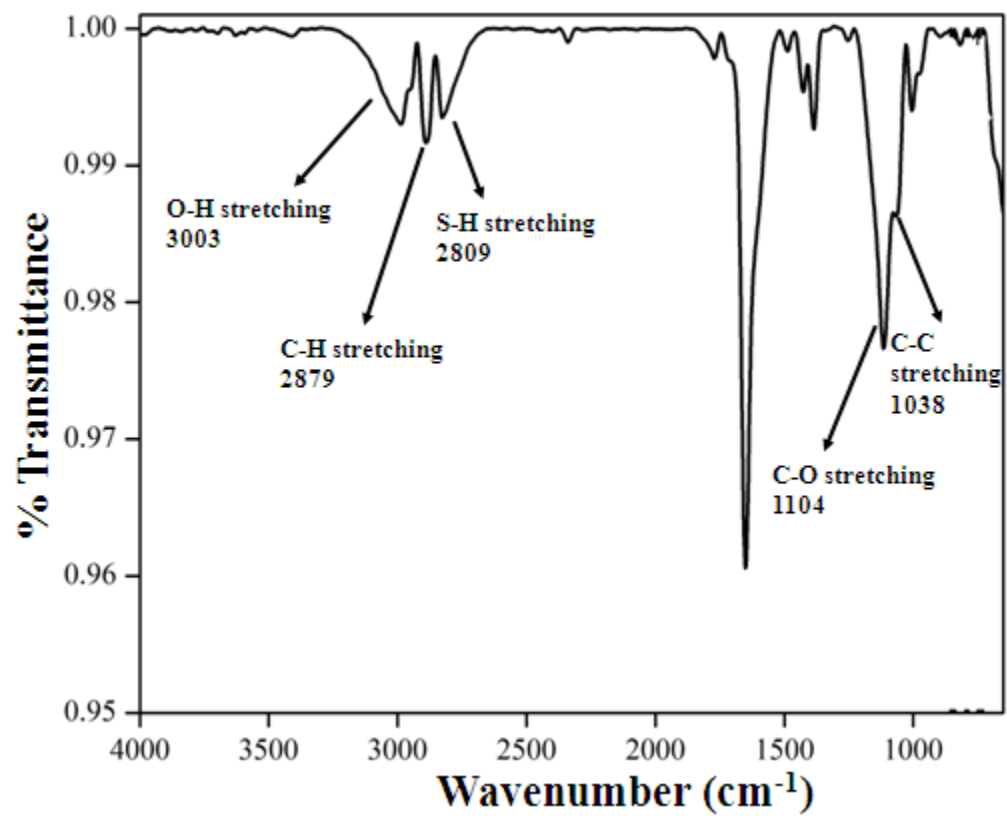

**Fig. S3.** Band gap calculation plot for S1.

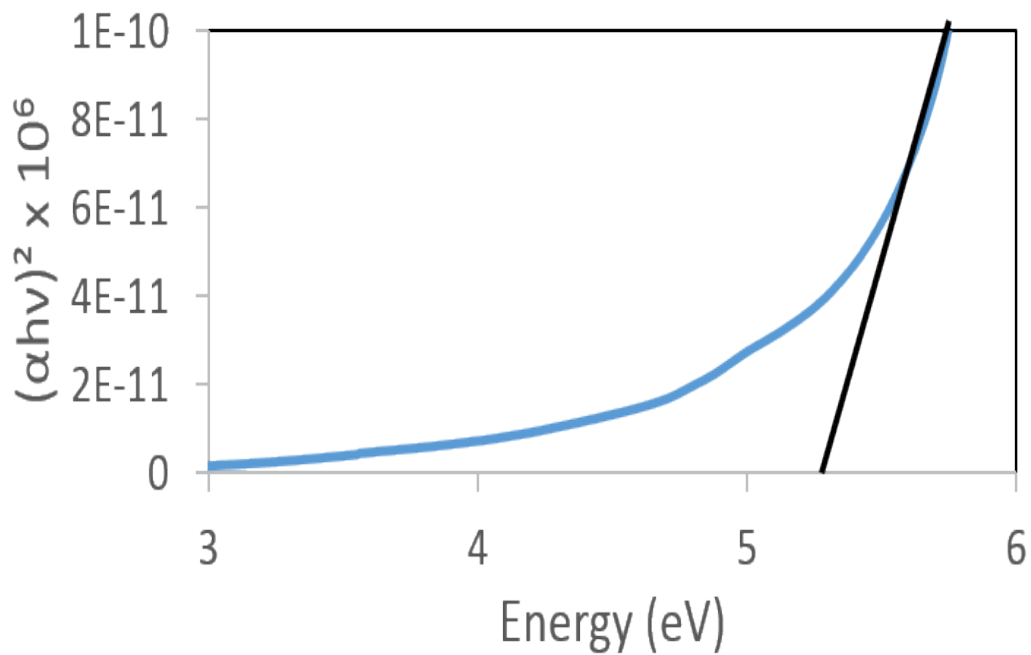

**Fig. S4.** Band gap calculation plot for S2.

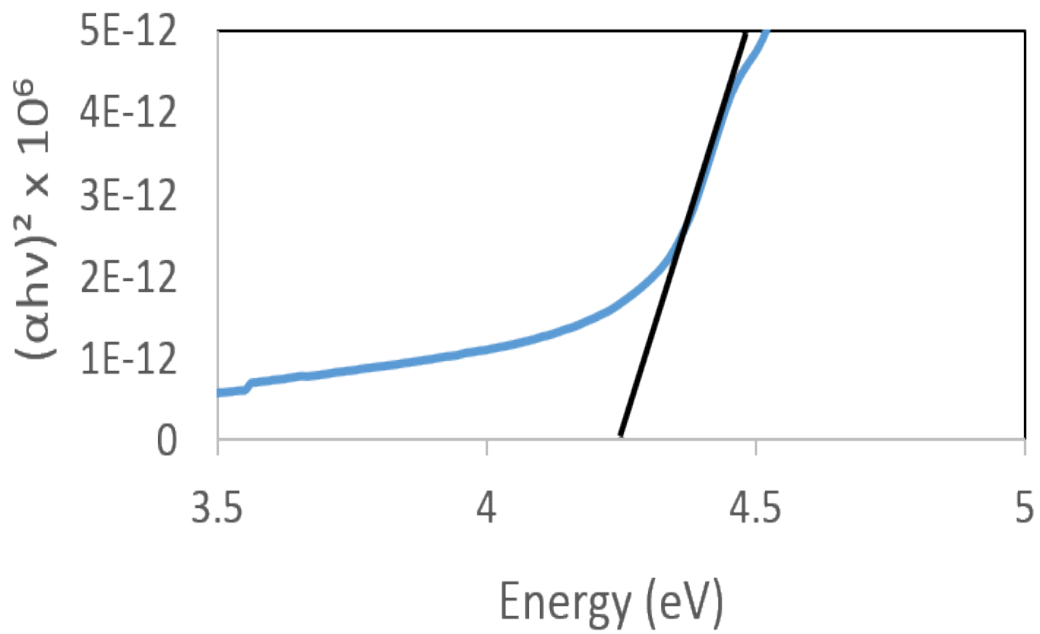

**Fig. S5.** Band gap calculation plot for S3.

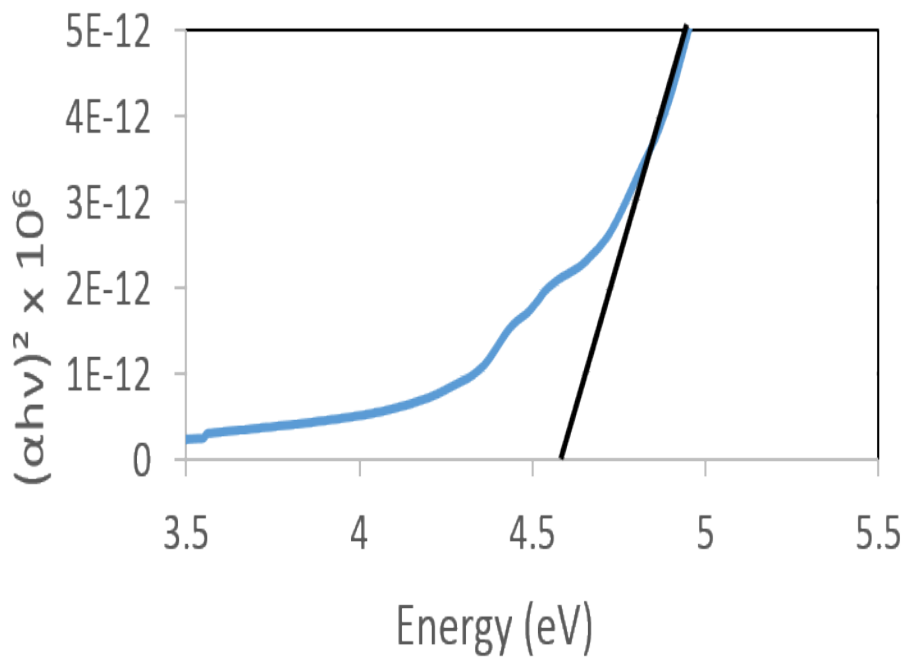

**Fig. S6.** Band gap calculation plot for S4.

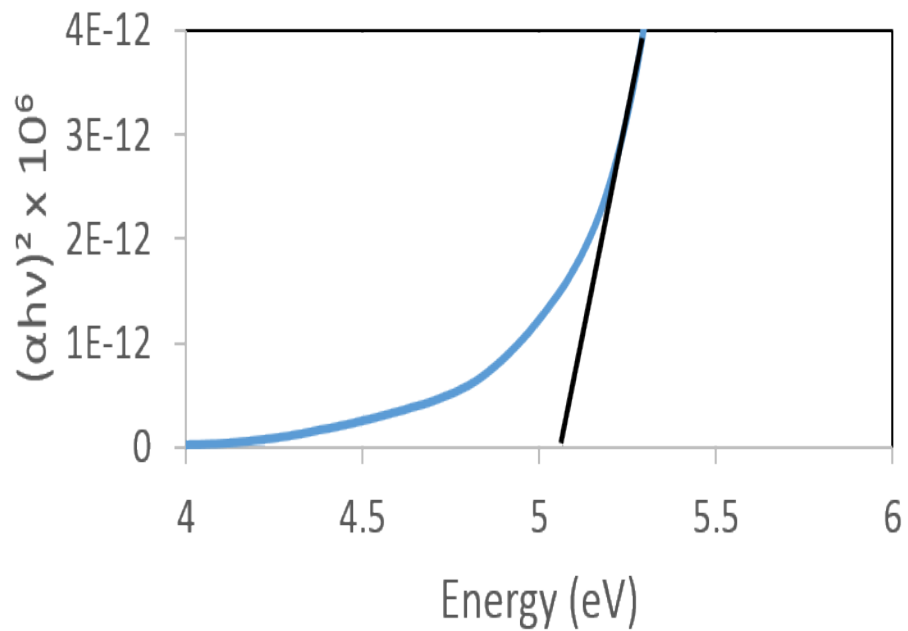

**Fig. S7** XRD patterns of the as-prepared ZnS microspheres, uncapped (**S3(a)**) and MCE-capped (**S4(a)**) and the recycled samples after photocatalysis (**S3(b)**) and MCE-capped (**S4(b)**).

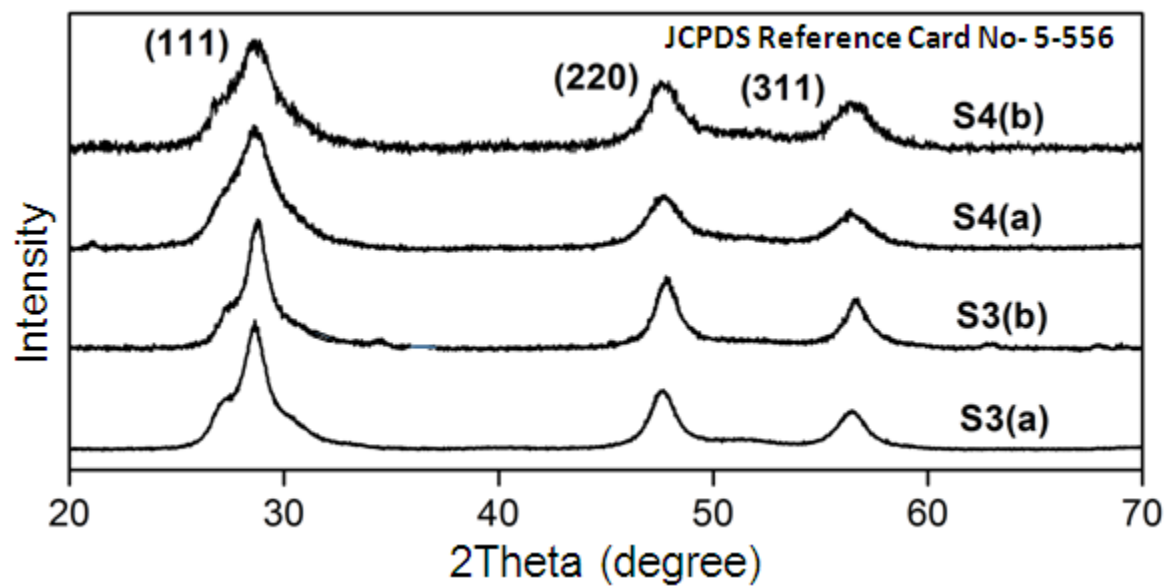

**Scheme S1.** Proposed mechanism of photocatalytic degradation of MO showing possible pathways en route to the formation of CO<sub>2</sub> and H<sub>2</sub>O.

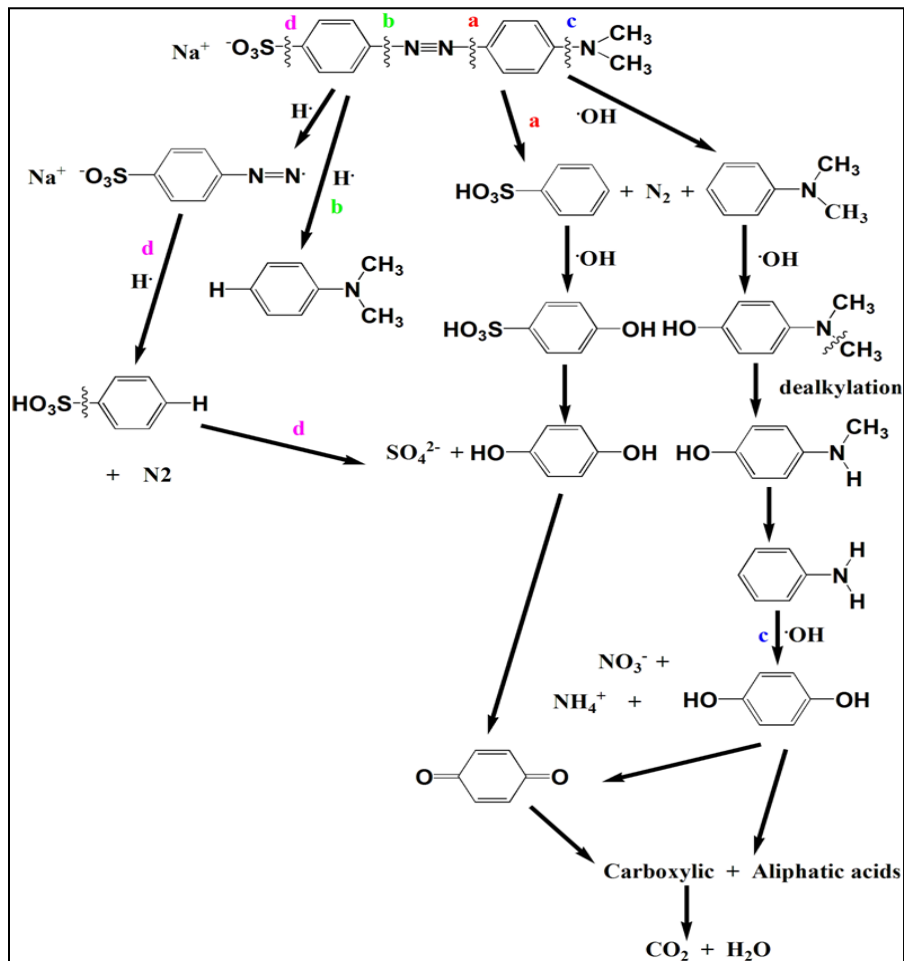

Supplement: c4ce02556c1.pdf [file c4ce02556c1.pdf]
